# Supplementary material for: Genome-wide association study of maize resistance to Pythium aristosporum stalk rot
Source: Frontiers journal article supplement (doi:10.3389/fpls.2023.1239635), 2023-08-17
Supplement: Data_Sheet_1.pdf [file Data_Sheet_1.pdf]

# Genome-wide association study of maize resistance to *Pythium aristosporum* stalk rot

Mengwei Hou<sup>1,†</sup>, Yanyong Cao<sup>1,†\*</sup>, Xingrui Zhang<sup>2,†</sup>, Shulin Zhang<sup>3</sup>, Tengjiao Jia<sup>1</sup>, Jiwei Yang<sup>1</sup>, Shengbo Han<sup>1</sup>, Lifeng Wang<sup>1</sup>, Jingjing Li<sup>1</sup>, Hao Wang<sup>1</sup>, Lili Zhang<sup>1</sup>, Xiaolin Wu<sup>4</sup>, Canxing Duan<sup>2,\*</sup>, Huiyong Li<sup>1,\*</sup>

<sup>1</sup>Institute of Cereal Crops, Henan Academy of Agricultural Sciences, Zhengzhou 450002, China.

<sup>2</sup>Institute of Crop Sciences, Chinese Academy of Agricultural Sciences, Beijing 100081, China.

<sup>3</sup> College of Biology and Food Engineering, Anyang Institute of Technology, Anyang 455099, China

<sup>4</sup> College of Life Science, Henan Agricultural University, Zhengzhou 450002, China

<sup>†</sup>These authors contributed equally to this work and share first authorship.

\*Correspondence: Yanyong Cao (yanyongcao@126.com), Canxing Duan (duancanxing@caas.cn), Huiyong Li (lihuiyong1977@126.com)

A

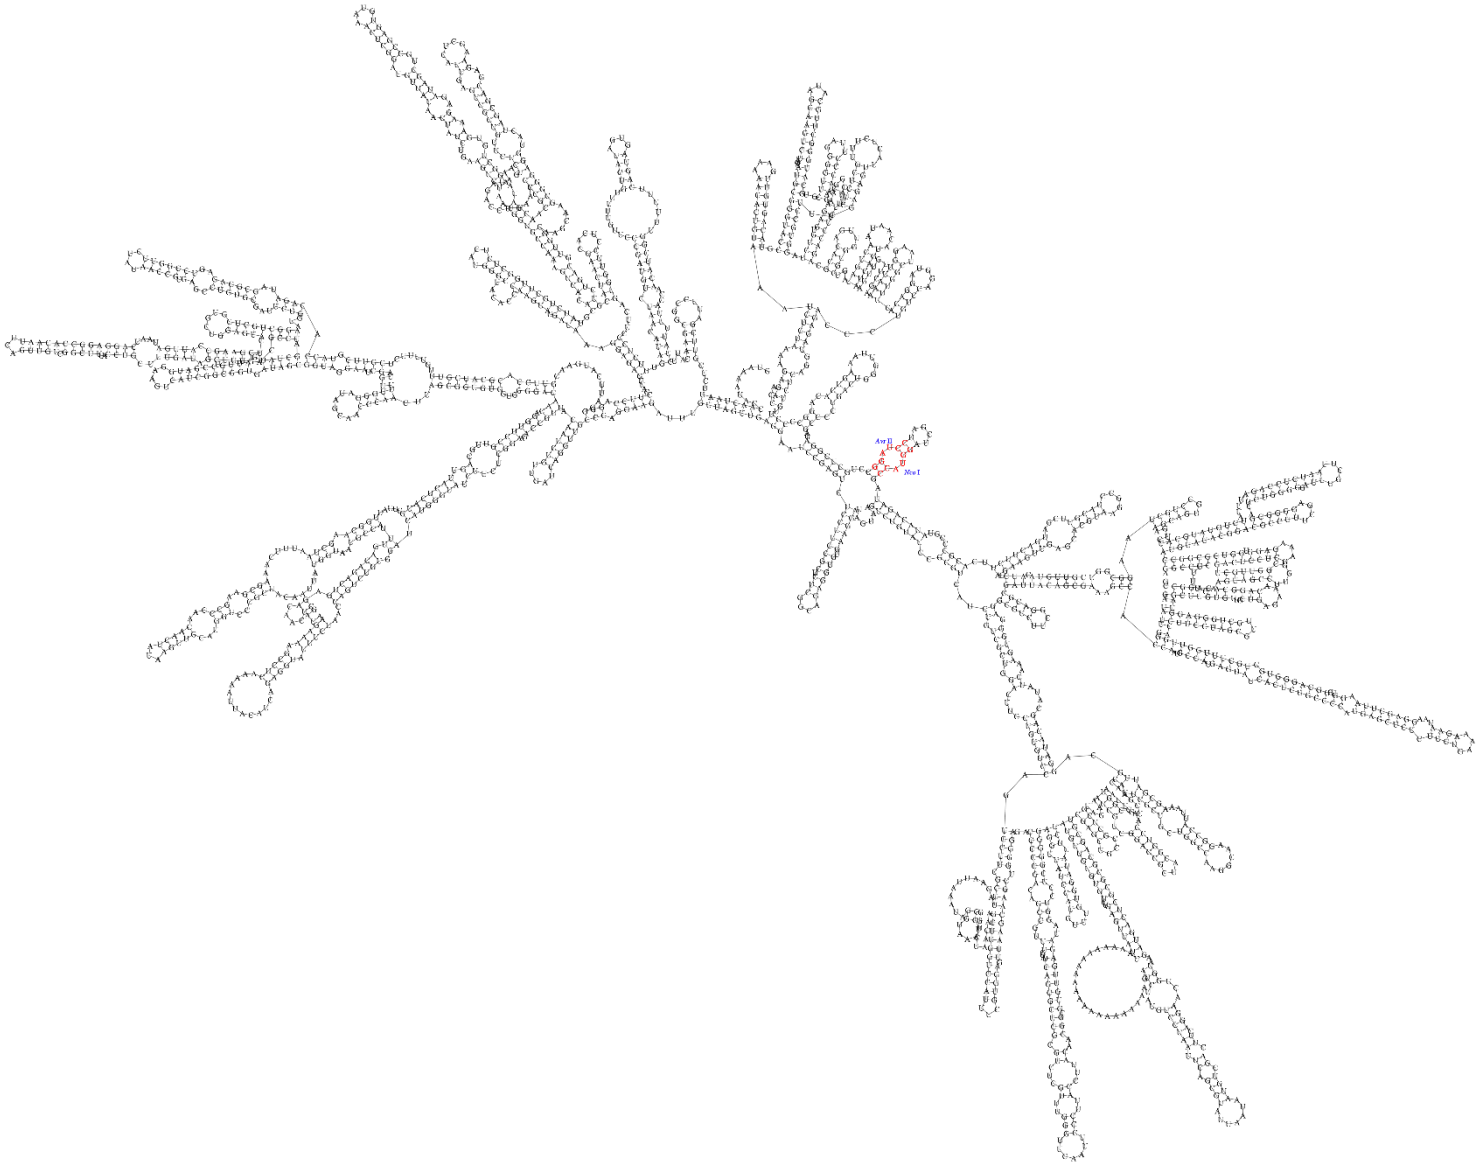

**B**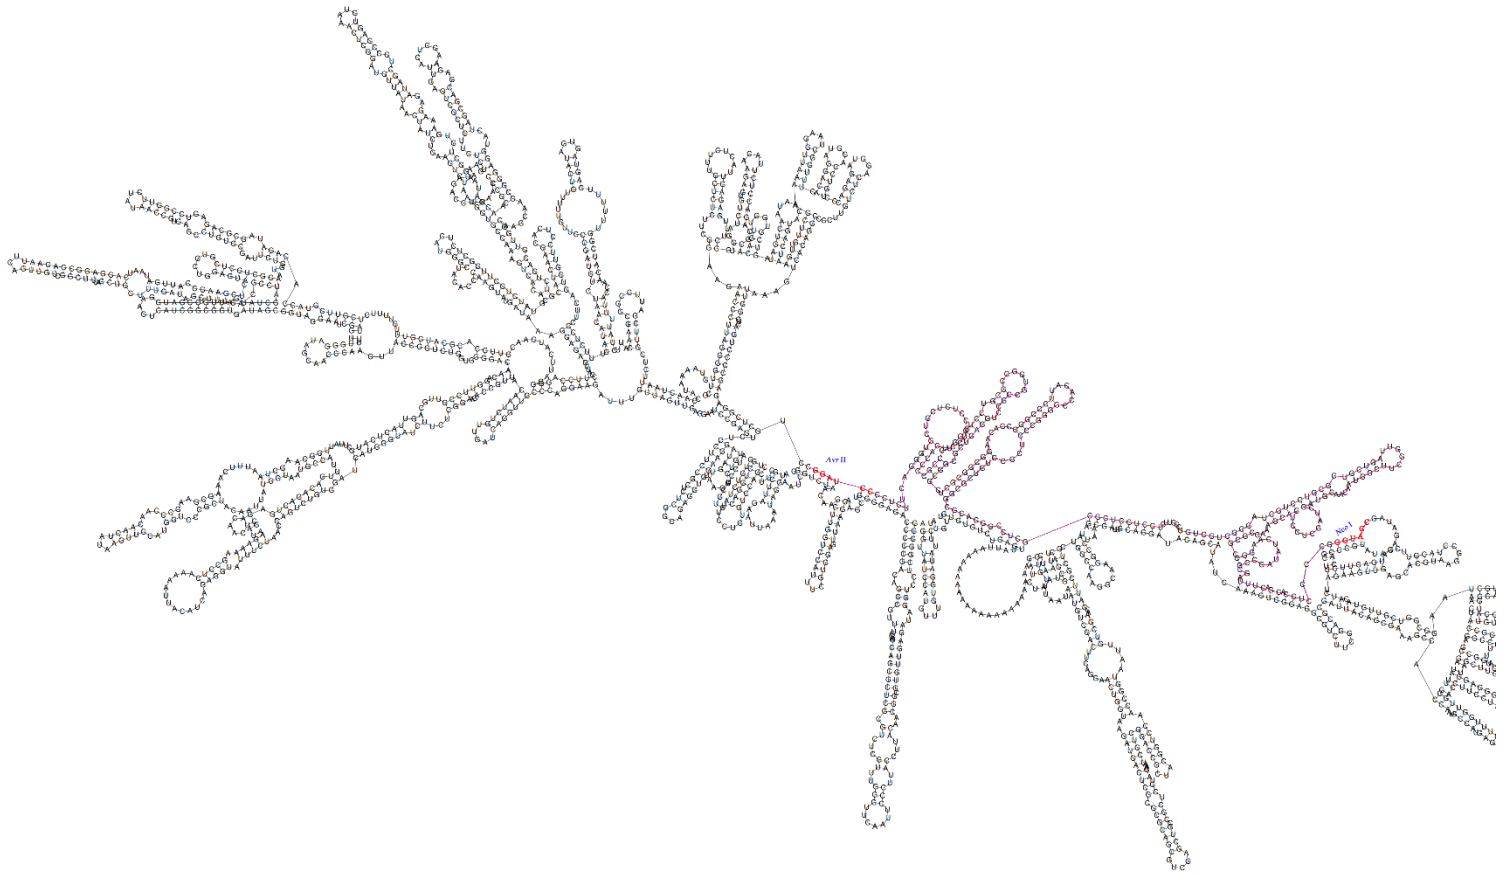

**FIGURE S1** | Deep learning predicted BMVCP5 (+) strand RNA3 second structure without and with *Zm00001d051313* gene-specific fragment inserts. Full length (+) stands of BMV RNA3, without (A) or with gene fragment inserts representing *Zm00001d051313* (B) were folded with the MXFold2 Web server (<http://www.dna.bio.keio.ac.jp/mxfold2/>). Locations of the two cloning sites are indicated. Gene-specific fragment inserts were shown with magenta dashed lines.

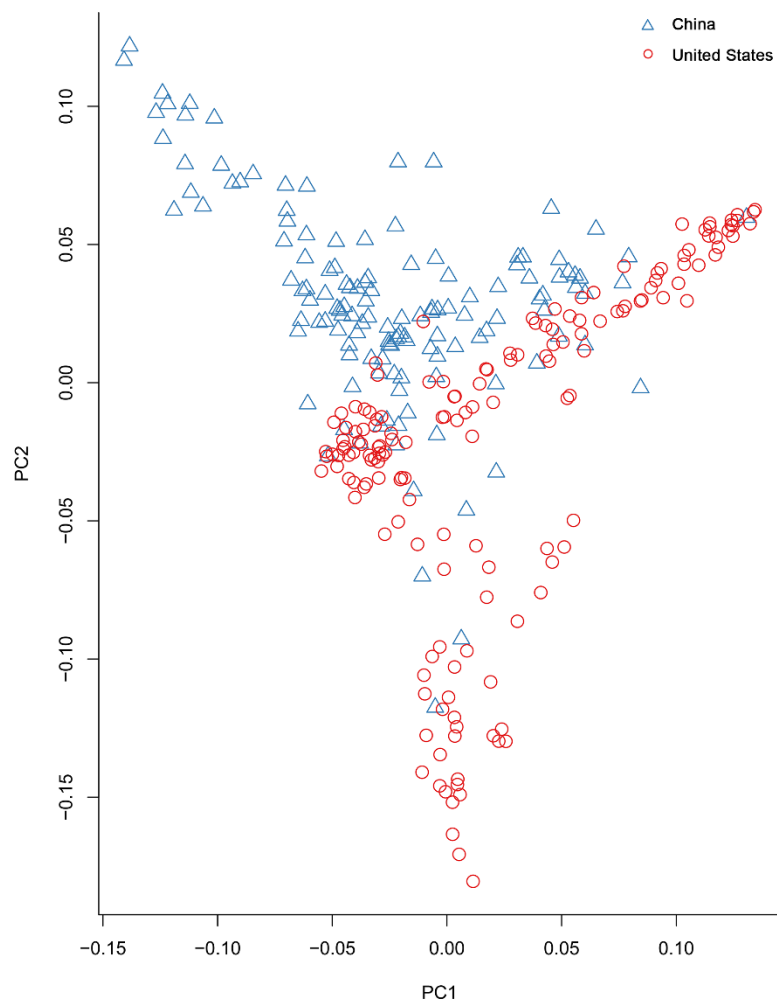

**FIGURE S2** | Principal component (PC) analysis based on SNP genotypic data. Blue triangles and red circles indicate inbred lines that collected from China, and United States, respectively.

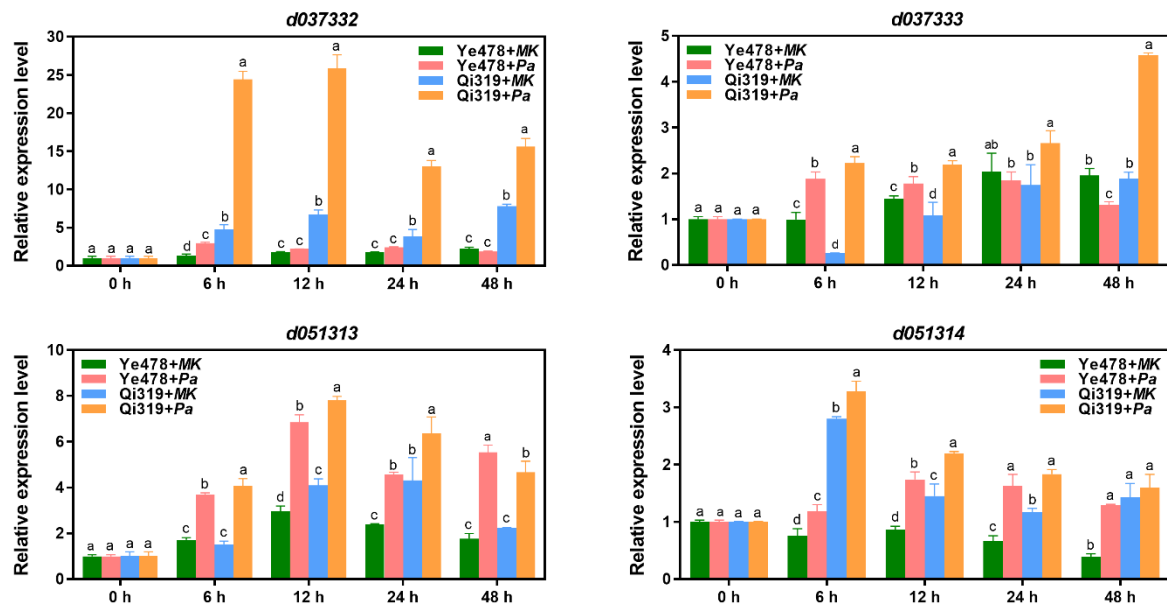

**FIGURE S3** | Expression of the four candidate genes was quantified by qRT-PCR in two control inbred lines post *Pythium aristosporum* infection. Different letters on the columns show a significant difference ( $P < 0.05$ ) as determined by the Tukey-Kramer test.
