# Supplementary material for: Genome-wide association study of maize resistance to Pythium aristosporum stalk rot
Source: Front Plant Sci. 2023 Aug 17;14:1239635. doi: 10.3389/fpls.2023.1239635 (PMC10470045; doi:10.3389/fpls.2023.1239635)
Supplement: Supplementary file 2 [file Table_1.xlsx]

## Sheet: Supplementary Table S1
Supplementary Table S1 The primers used in this study
Primer	Sequence*	Usage	Ref
d051313F	CTATCTGTGCGGAGCCCT	d051313 qPCR
d051313R	CCCTTGGCAGAAGAAGAACT
d051314F	AGAGGAAGGCGTGTTGGTG	d051314qPCR
d051314R	GAGCCGAAGTCGCAGAGC
d037332F	GCTTGCGATGACGGACAG	d037332qPCR
d037332R	GCAGGCGGCGTAGAAACA
d037333F	CTGGTCGTCGTGCTAAGC	d037333qPCR
d037333R	GCTATGTCCTGTCTCCCAG
GAPDH F	CCATCACTGCCACACAGAAAAC	reference gene
GAPDH R	AGGAACACGGAAGGACATACCAG
BMV-1313F	ACGCCCGTATACAGATAGCCATGGGCCCCTCCACGACTTTAGC	d051313 VIGS
BMV-1313R	CAGGGGCTCTCCGAGCAGGCCTAGGGGAGAAGTCCCACGACGAGA
PR3-f	GAACAACTACAGCAGCCAGGTG	PR3 qPCR	10.1038/s41477-018-0116-y
PR3-r	GAGACAATAGCTGACATGCGTC
PR4-f	GCGTTCAAGCCCATCGACA	PR4 qPCR	10.1038/s41477-018-0116-y
PR4-r	CGTGTGGGATCACATCCATATAAC
PR5-f	TATCGGCCGGAATAGGCTCTG	PR5 qPCR	10.1038/s41477-018-0116-y
PR5-r	CGCGTACATACAAATGCGTGC
PR10-f	CAAGCTCATCGCAGACCAC	PR10 qPCR	10.1038/s41477-018-0116-y
PR10-r	CGATCTCAACAGTCCAGCTGTT
* Restrictions sites are shown in italic.

## Sheet: Supplementary Table S2
Supplementary Table S2 The resistance levels of 295 maize inbred lines evaluated in two experimental sites throutth artificilal inoculation
			Xinxiang		Dancheng
No.	Varicty	From	DSI (%)	Resistance level	DSI (%)	Resistence level
1	X1553	China	93.6508	HS	62.2222	S
2	X1554	China	81.7901	S	60.5556	MR
3	X1556	China	82.0513	S	80	S
4	X1557	China	50.1852	MR	49.4949	MR
5	X1559	China	68.0556	S	60.1852	MR
6	X1560	China	75.3086	S	56.8254	MR
7	X1561	China	77.7778	S	40.4762	MR
8	X1562	China	76.7974	S	46.5368	MR
9	X1563	China	65.4457	S	55.5556	MR
10	X1566	China	60.2849	MR	57.7778	MR
11	X1567	China	82.825	S	63.7963	S
12	Aijin525	China	71.9136	S	71.2121	S
13	Lv28	China	72.963	S	46.6667	MR
14	E28	China	69.8413	S	76.8519	S
15	Ye8112	China	75.6159	S	39.5299	MR
16	Dan340	China	16.6667	R	59.2593	MR
17	Huangyesi3	China	63.8584	S	73.7374	S
18	K12	China	94.4444	HS	46.3492	MR
19	D729	China	58.3333	MR	64.7186	S
20	Tai184	China	100	HS	56.9444	MR
21	Fu96	China	69.0171	S	48.3951	MR
22	Ji880	China	74.0741	S	70.2742	S
23	Jiu03	China	81.8182	S	66.4957	S
24	Qi318	China	63.6958	S	48.2517	MR
25	48-2	China	58.1197	MR	54.6296	MR
26	FR218	China	87.2507	HS	68.3598	S
27	Yi67	China	73.9434	S	69.3376	S
28	91Huang5	China	80.5556	S	73.6111	S
29	Liao5110	China	92.9825	HS	78.3883	S
30	De811	China	75.817	S	50.272	MR
31	Lo1125	China	91.4566	HS	63.2323	S
32	K36	China	87.1693	HS	65.5556	S
33	P138	China	90.5653	HS	60.0289	MR
34	488	China	80.2288	S	48.1197	MR
35	Shen137	China	60.3175	MR	48.0808	MR
36	X.L9010-3/O2	China	74.0741	S	34.2593	R
37	Guan17-1	China	60.4938	MR	41.2963	MR
38	Yue89E4-2	China	57.7778	MR	65.2116	S
39	444	China	55.5556	MR	37.037	R
40	Zao49	China	56.0847	MR	46.4286	MR
41	87-20	China	83.2772	HS	53.5354	MR
42	Zhonger/O2	China	65.7407	S	47.9701	MR
43	92Huang7	China	75	S	48.8889	MR
44	785	China	83.3333	S	36.5741	R
45	Lo1067	China	75	S	64.0741	S
46	178	China	57.3413	MR	51.3889	MR
47	87-1	China	49.4505	MR	54.1667	MR
48	Ye478	China	72.2222	S	68.8889	S
49	Qi319	China	60.2469	MR	34.5679	R
50	Fu842	China	42.716	MR	18.254	R
51	ZhengH03	China	53.7919	MR	29.6296	R
52	457-1	China	77.7778	S	100	HS
53	PH6WC	China	74.8148	S	42.7249	MR
54	CT03	China	77.9798	S	66.2963	S
55	M54	China	77.2467	S	69.5513	S
56	W917	China	80	S	68.8492	S
57	KW7M031	China	66.0598	S	58.5859	MR
58	ZhengH04	China	77.7778	S	41.6667	MR
59	PHB1M	China	78.5185	S	62.1212	S
60	KW4M029	China	89.5062	HS	57.963	MR
61	Xianyu335G	China	73.4127	S	55.4321	MR
62	Fu842	China	70.8333	S	49.3827	MR
63	488	China	80.8466	S	50.9259	MR
64	X.L9010-3/O2	China	74.4444	S	50.4274	MR
65	Yue20-3	China	85.8364	HS	67.6768	S
66	Chihuang32	China	74.4444	S	60.4558	MR
67	HR962	China	59.4771	MR	46.2963	MR
68	Zheng63	China	55.2469	MR	64.9471	S
69	515/17/8701	China	60.1852	MR	51.1111	MR
70	Xu178	China	59.2593	MR	64.8148	S
71	PH4CV	China	84.9206	HS	63.2997	S
72	248	China	86.8519	HS	86.2795	HS
73	Zheng60	China	89.6296	HS	59.5238	MR
74	LX9801	China	86.1111	HS	66.6667	S
75	92--8	China	79.3981	S	45.679	MR
76	Zheng37	China	93.0225	HS	44.3813	MR
77	Zheng32	China	97.1759	HS	74.0741	S
78	A261	China	76.6082	S	75.817	S
79	A266	China	84.7222	HS	48.4848	MR
80	A301	China	71.8364	S	65	S
81	A305	China	67.5926	S	80.9524	S
82	A312	China	91.2698	HS	60.4396	MR
83	A314	China	48.1481	MR	45.7672	MR
84	A325	China	56.9444	MR	59.2593	MR
85	A333	China	73.8889	S	74.8148	S
86	A348	China	79.1246	S	54.1514	MR
87	A349	China	71.6049	S	73.8889	S
88	A350	China	92.5926	HS	78.9683	S
89	A354	China	82.4074	S	72.7778	S
90	A355	China	82.2222	S	56.9444	MR
91	A359	China	81.746	S	76.3889	S
92	A367	China	78.1987	S	65.5556	S
93	A370	China	58.3333	MR	39.5767	MR
94	A371	China	69.0546	S	51.7593	MR
95	A379	China	88.8889	HS	83.3333	HS
96	A382	China	84.6688	HS	72.3457	S
97	A385	China	92.5926	HS	53.6908	MR
98	A387	China	60.3535	MR	54.9495	MR
99	A392	China	81.8182	S	80.5556	S
100	A407-2	China	63.3333	S	51.2821	MR
101	A422	China	82.672	S	35.5556	R
102	A426-1	China	59.9537	MR	64.7059	S
103	A428	China	73.6111	S	66.9312	S
104	A433	China	64.4444	S	59.0476	MR
105	A445	China	88.8889	HS	70.3431	S
106	A448	China	44.4444	MR	77.7778	S
107	A450	China	77.866	S	54.3651	MR
108	A1052	China	79.4872	S	81.4484	S
109	A1393	China	72.1053	S	65.0183	S
110	A3172	China	75.9259	S	63.2099	S
111	A3852	China	75.5556	S	47.2756	MR
112	Xun2278	China	73.4127	S	61.2179	S
113	Xun7981	China	72.2222	S	58.547	MR
114	Xun1584	China	84.5833	HS	46.0494	MR
115	Xun50X	China	69.4444	S	64.1026	S
116	XunX35	China	96.8254	HS	54.0741	MR
117	Luo563	China	54.6581	MR	43.1624	MR
118	Luolz06-1	China	85.7143	HS	38.3838	R
119	Luo611	China	90.3175	HS	66.6667	S
120	4441	China	70.6349	S	64.3056	S
121	4468	China	71.0438	S	59.3651	MR
122	ZK21151	China	65.4672	S	58.4325	MR
123	ZK21476	China	100	HS	73.7654	S
124	Zhou9501	China	81.9444	S	80.1865	S
125	KZ123	China	72.2222	S	52.381	MR
126	HM12111	China	78.9216	S	65.873	S
127	DH351	China	77.2436	S	78.844	S
128	DH382	China	78.9352	S	71.7172	S
129	W01-Zheng335	China	56.8182	MR	55.7407	MR
130	ZB001	China	71.6667	S	81.6993	S
131	2014X2271-3	China	60.7532	MR	67.5926	S
132	2014X2273-2	China	70	S	66.6667	S
133	2013X3770-2	China	63.8889	S	61.6402	S
134	B73	America	83.5017	S	78.4771	S
135	B89	America	69.6759	S	70.5603	S
136	B97	America	72.0988	S	51.8519	MR
137	B98	America	70.5556	S	47.3504	MR
138	B100	America	71.6524	S	57.4074	MR
139	B101	America	70.3704	S	69.4444	S
140	B104	America	95.0337	HS	77.0899	S
141	B107	America	82.6389	S	55.5556	MR
142	B109	America	77.4929	S	71.3564	S
143	B110	America	71.2963	S	48.7179	MR
144	B119	America	82.4675	S	62.8816	S
145	B120	America	68.6869	S	52.2145	MR
146	B123	America	72.7273	S	48.9621	MR
147	B125	America	82.6984	S	69.5062	S
148	IRF311	America	73.5043	S	66.2257	S
149	IRF314	America	74.7475	S	69.5833	S
150	IRF315	America	81.8182	S	56.4815	MR
151	IRF316	America	72.963	S	76.8519	S
152	IRF318	America	63.2479	S	67.4269	S
153	LH38	America	75.9259	S	61.1111	S
154	LH104	America	55.5556	MR	72.2222	S
155	LH109	America	69.8413	S	76.3889	S
156	IRF233	America	83.3333	S	57.672	MR
157	IRF236	America	66.6667	S	66.6667	S
158	IRF252	America	73.6111	S	75.6944	S
159	IRF291	America	85.049	HS	86.2374	HS
160	207	America	79.4444	S	78.244	S
161	764	America	74.0741	S	74.8677	S
162	779	America	81.4815	S	79.2659	S
163	792	America	82.9167	S	69.6649	S
164	794	America	76.6667	S	69.3827	S
165	807	America	73.3333	S	52.4242	MR
166	6103	America	59.7222	MR	60.6838	MR
167	7804	America	82.716	S	66.7677	S
168	7810	America	75.9907	S	70.9402	S
169	4676A	America	67.6435	S	61.5385	S
170	B47	America	71.2121	S	60.1587	MR
171	DJ7	America	81.25	S	57.1429	MR
172	F42	America	64.4444	S	49.2063	MR
173	FR19	America	74.6032	S	71.1111	S
174	G80	America	73.0769	S	55.5556	MR
175	HBA1	America	70.5948	S	64.4078	S
176	LH132	America	63.8889	S	62.1795	S
177	LH143ma	America	78.7037	S	78.268	S
178	LH145	America	81.9444	S	70.7407	S
179	LH39	America	77.7778	S	63.4921	S
180	LH51	America	44.4444	MR	39.8148	MR
181	LH52	America	81.4815	S	65.6566	S
182	LH59	America	76.8519	S	46.1279	MR
183	LH60	America	60.8466	MR	58.7302	MR
184	LH61	America	58.7302	MR	49.359	MR
185	LH74	America	67.328	S	60	MR
186	LH82	America	80.2808	S	68.1046	S
187	LH85?	America	77.9012	S	70.5387	S
188	LH93	America	80.5921	S	57.5163	MR
189	PHG29	America	87.3016	HS	89.6296	HS
190	PHG35	America	68.5185	S	72.6852	S
191	PHG39	America	57.8898	MR	55.5556	MR
192	PHG50	America	74.0741	S	73.3333	S
193	PHG71	America	87.4644	HS	67.5926	S
194	PHG72	America	82.8001	S	72.906	S
195	PHG83	America	85.7143	HS	66.6667	S
196	PHG86	America	69.1026	S	52.4573	MR
197	PHZ51	America	85.1852	HS	89.8148	HS
198	IB014	America	71.2121	S	60.3175	MR
199	B103	America	77.7778	S	55.5556	MR
200	B93	America	94.1026	HS	77.4074	S
201	NS701	America	84.2857	HS	67.7778	S
202	78371A	America	68.5714	S	52.6455	MR
203	PB80	America	91.3889	HS	61.8581	S
204	MBPM	America	92.0228	HS	76.1218	S
205	IBC2	America	78.8377	S	48.4386	MR
206	PHK29	America	80.5195	S	30.5556	R
207	PHK05	America	75.7496	S	53.8721	MR
208	PHR25	America	73.4921	S	59.2593	MR
209	740	America	80.7843	S	47.9772	MR
210	787	America	58.9744	MR	47.3214	MR
211	790	America	75	S	53.7879	MR
212	793	America	91.5675	HS	49.8148	MR
213	W8304	America	68.8889	S	57.5163	MR
214	PHK42	America	68.6949	S	72.4942	S
215	PHK76	America	69.5062	S	57.7778	MR
216	PHN11	America	76.9841	S	83.642	HS
217	PHT77	America	63.8889	S	47.9798	MR
218	PHV63	America	75.957	S	59.8765	MR
219	LH149	America	67.9012	S	66.3781	S
220	NS501	America	89.1204	HS	57.4074	MR
221	OQ603	America	77.2222	S	34.9003	R
222	S8324	America	75	S	57.2222	MR
223	S8326	America	64.6914	S	54.8611	MR
224	IBB14	America	74.0741	S	75.7143	S
225	MBST	America	74.2857	S	76.7677	S
226	PHR47	America	65.1472	S	65.5773	S
227	PHW79	America	70.3704	S	70.8193	S
228	1538	America	73.0556	S	62.2222	S
229	WIL900	America	51.5152	MR	31.857	R
230	WIL901	America	45.5649	MR	43.0403	MR
231	WIL903	America	60.3704	S	53.8272	MR
232	L 127	America	71.4815	S	58.3333	MR
233	L 135	America	75.7407	S	65.4762	S
234	L 139	America	81.4815	S	62.963	S
235	W8555	America	76.9841	S	42.9167	MR
236	E8501	America	78.4722	S	47.2222	MR
237	4N506	America	77.113	S	68.2906	S
238	PHJ33	America	87.1693	HS	70	S
239	PHJ70	America	80.0214	S	73.9683	S
240	PHK35	America	80.9259	S	73.8928	S
241	PHM10	America	72.5309	S	63.3333	S
242	PHN29	America	71.4286	S	93.8272	HS
243	PHN82	America	86.0119	HS	85.8252	HS
244	PHR62	America	81.8182	S	77.7778	S
245	PHT22	America	59.2593	MR	38.4259	R
246	PHV37	America	68.7037	S	57.284	MR
247	PHW03	America	77.0833	S	59.8901	MR
248	PHW43	America	75.2137	S	87.2365	HS
249	LH195	America	71.2963	S	59.4949	MR
250	LH205	America	87.037	HS	71.7172	S
251	LH127	America	69.9755	S	44.2593	MR
252	LH163	America	82.7228	S	80.9524	S
253	LH196	America	82.963	S	75.2137	S
254	LH206	America	87.037	HS	62.2222	S
255	LH220Ht	America	82.3457	S	55.754	MR
256	LH190	America	77.2894	S	40.6863	MR
257	LH194	America	75.8418	S	61.3426	S
258	LH202	America	81.746	S	69.1858	S
259	LH193	America	80.6878	S	60.6061	MR
260	PHN34（PHJ65）	America	81.713	S	82.5397	S
261	PHP76	America	88.8889	HS	68.8034	S
262	PHV07	America	55.5556	MR	64.5299	S
263	PHW51	America	60.9259	MR	47.9718	MR
264	BCC03	America	65.1852	S	45.7407	MR
265	6F629	America	58.9744	MR	69.6442	S
266	6M502A	America	87.1429	HS	64.9471	S
267	NL001	America	85.2273	HS	56.8254	MR
268	LH128	America	77.7778	S	77.037	S
269	LH181	America	63.1173	S	40.1235	MR
270	LH212Ht	America	84.6154	HS	67.6046	S
271	LH213	America	67.9012	S	40.2116	MR
272	PHJ89	America	76.6667	S	63.6892	S
273	PHJ90	America	87.2365	HS	71.6402	S
274	PHN66	America	81.2963	S	62.4369	S
275	PHR58	America	72.2222	S	44.359	MR
276	PHW30	America	82.8241	S	73.5043	S
277	29MIBZ2	America	77.037	S	71.8254	S
278	MBUB	America	70.1058	S	63.2479	S
279	LH209	America	63.4199	S	63.5328	S
280	F118	America	71.345	S	49.1202	MR
281	LH214	America	75.6944	S	60.0673	MR
282	911	America	82.716	S	80.1017	S
283	LH222	America	85.8262	HS	78.268	S
284	ICI 441	America	76.1905	S	59.7643	MR
285	CS405	America	85.873	HS	55.8923	MR
286	NQ508	America	71.0675	S	72.6496	R
287	OQ101	America	66.66	S	58.4848	MR
288	PHBA6	America	76.7901	S	72.8004	S
289	PHP85	America	60.6481	MR	62.963	S
290	PHPR5	America	73.0769	S	61.6162	S
291	PHR30	America	76.455	S	70.2116	S
292	PHVA9	America	67.619	S	61.2795	S
293	PHWG5	America	75	S	48.1481	MR
294	ML606	America	75.6863	S	61.1786	S
295	ZS01250	America	81.4815	S	48.3245	MR
DSI, disease severity index; resistant (R), moderately resistant (MR), susceptible (S), and highly susceptible (HS)

## Sheet: Supplementary Table S3
Supplementary Table S3 Statistical analysis of DSI variation in two experimental environments
Environment	Mean±SD (%)	Range (%)	Skewness	Kurtosis	H2	G	E	G*E
Combination	67.46±0.58	16.67–100	-0.42	0.02	0.68	**	**	**
Xinxiang	73.55±0.73	16.67–100	-0.97	1.88	0.86
Dancheng	61.37±0.74	18.25–100	-0.14	0.03	0.84
E: Environment; G: Genotype; G*E: Genotype-by-environment interaction
** indicated the signifcant at P<0.01

## Sheet: Supplementary Table S4
Supplementary Table S4 Annotation of SNP.
	Category	Number of SNPs
	UTR5; UTR3	888
	UTR5	2122
	UTR3	3629
	splicing	78
	upstream	10853
	intronic	18256
	ncRNA_intronic	297
	ncRNA_exonic	305
exonic	nonsynonymous	3801
exonic	stopgain	150
exonic	stoploss	21
exonic	synonymous	3221
	downstream	11102
	upstream; downstream	2336
	intergenic	160874
	Total	217933

## Sheet: Supplementary Table S5
Supplementary Table S5 Significant SNPs and candidate genes fo associated with Pythium aristosporum stalk rot using six GWAS method.
Method	Marker name	Chr.	Position(Mb)	bin	-log(10)P	MAF	Enviroment	Candidate genes
Blink FarmCPU GLM MLM MLMM SUPER	S4_153228905	4	153.22	4.06	5.84842	0.0949153	Xinxiang	Zm00001d051313;Zm00001d051314
GLM MLM MLMM	S4_153228676	4	153.22	4.06	5.70405	0.0932203	Xinxiang	Zm00001d051313;Zm00001d051314
GLM MLM MLMM SUPER	S4_153270388	4	153.27	4.06	6.16726	0.111864	Xinxiang	Zm00001d051313;Zm00001d051314;Zm00001d051315
MLMM SUPER	S4_153270407	4	153.27	4.06	6.19449	0.108475	Xinxiang	Zm00001d051313;Zm00001d051314;Zm00001d051315
GLM	S5_112196802	5	112.19	5.04	5.26765	0.318644	Xinxiang	Zm00001d015719
GLM	S7_132506077	7	132.5	7.03	5.11863	0.10339	Xinxiang	Zm00001d020779;Zm00001d020780;Zm00001d020781;Zm00001d020782;Zm00001d020783;Zm00001d020784
GLM	S1_239239719	1	239.23	1.08	5.10979	0.118644	Xinxiang	Zm00001d032815;Zm00001d032817;Zm00001d032819;Zm00001d032821;Zm00001d032822;Zm00001d032823;Zm00001d032824
GLM	S1_1102548	1	1.1	1.01	5.10915	0.0440678	Xinxiang	Zm00001d027265;Zm00001d027266;Zm00001d027267;Zm00001d027268;Zm00001d027269
MLMM	S10_112103263	10	112.1	10.04	5.02998	0.0677966	Xinxiang	Zm00001d025271;Zm00001d025273;Zm00001d025274;Zm00001d025275;Zm00001d025277
SUPER	S4_153270402	4	153.27	4.06	5.7263	0.111864	Xinxiang	Zm00001d051313;Zm00001d051314;Zm00001d051315
SUPER	S4_153270414	4	153.27	4.06	5.52836	0.10678	Xinxiang	Zm00001d051313;Zm00001d051314;Zm00001d051315
SUPER	S5_114034094	5	114.03	5.04	5.18824	0.379661	Xinxiang	Zm00001d015729;Zm00001d015730
SUPER	S5_111741189	5	111.74	5.04	5.07337	0.383051	Xinxiang	Zm00001d015717
SUPER	S5_101697979	5	101.69	5.04	5.07157	0.249153	Xinxiang	NA
SUPER	S1_129544255	1	129.54	1.05	5.01729	0.135593	Xinxiang	NA
Blink FarmCPU GLM MLM MLMM	S6_121809944	6	121.8	6.04	6.11456	0.277966	Dancheng	Zm00001d037332; Zm00001d037333
GLM MLM MLMM SUPER	S6_121810117	6	121.81	6.04	5.83392	0.274576	Dancheng	Zm00001d037332; Zm00001d037333
GLM SUPER	S2_139960708	2	139.96	2.05	6.18153	0.149153	Dancheng	NA
GLM SUPER	S6_122068973	6	122.06	6.04	5.59915	0.105085	Dancheng	Zm00001d037337; Zm00001d037338; Zm00001d037339; Zm00001d037340; Zm00001d037341; Zm00001d037342; Zm00001d037343
GLM SUPER	S2_139808418	2	139.8	2.05	6.04258	0.138983	Dancheng	Zm00001d004794; Zm00001d004796
GLM	S7_165626461	7	165.62	7.04	5.53466	0.147458	Dancheng	Zm00001d021892; Zm00001d021893; Zm00001d021894; Zm00001d021895; Zm00001d021896; Zm00001d021897; Zm00001d021898; Zm00001d021899; Zm00001d021900; Zm00001d021901; Zm00001d021902; Zm00001d021903
GLM	S5_203378787	5	203.37	5.06	5.44932	0.445763	Dancheng	NA
GLM	S1_198295784	1	198.29	1.06	5.4193	0.237288	Dancheng	NA
GLM	S6_121810095	6	121.81	6.04	5.22821	0.271186	Dancheng	Zm00001d037332; Zm00001d037333
GLM	S6_119342563	6	119.34	6.04	5.05397	0.118644	Dancheng	Zm00001d037279; Zm00001d037280; Zm00001d037281; Zm00001d037282; Zm00001d037284; Zm00001d037285;
MLMM	S1_155961508	1	155.96	1.05	5.07237	0.147458	Dancheng	NA
SUPER	S8_74048857	8	74.04	8.03	6.32976	0.327119	Dancheng	NA
SUPER	S7_75169966	7	75.16	7.01	6.31527	0.0915254	Dancheng	NA
SUPER	S8_74048853	8	74.04	8.03	6.22521	0.328814	Dancheng	NA
SUPER	S8_75312498	8	75.31	8.03	5.67838	0.388136	Dancheng	NA
SUPER	S6_137249013	6	137.24	6.05	5.56288	0.132203	Dancheng	Zm00001d037774; Zm00001d037775; Zm00001d037776; Zm00001d037777
SUPER	S6_28267804	6	28.26	6.01	5.48841	0.254237	Dancheng	Zm00001d035470; Zm00001d035471
SUPER	S10_43427698	10	43.42	10.03	5.46733	0.230508	Dancheng	NA
SUPER	S6_28267581	6	28.26	6.01	5.44862	0.252542	Dancheng	Zm00001d035470; Zm00001d035471
SUPER	S6_28267816	6	28.26	6.01	5.44862	0.252542	Dancheng	Zm00001d035470; Zm00001d035471
SUPER	S7_75170196	7	75.17	7.01	5.35388	0.0949153	Dancheng	NA
SUPER	S2_70900012	2	70.9	2.04	5.18401	0.481356	Dancheng	NA
SUPER	S7_150998782	7	150.99	7.03	5.13626	0.135593	Dancheng	Zm00001d021396; Zm00001d021398; Zm00001d021400; Zm00001d021401
SUPER	S8_75231723	8	75.23	8.03	5.08405	0.498305	Dancheng	NA

## Sheet: Supplementary Table S6
Supplementary Table S6 Annotation of candidate genes.
Candidate genes	Description	Candidate genes	Description
Zm00001d051313	Leucine-rich repeat (LRR) family protein	Zm00001d037340	Uncharacterized protein
Zm00001d051314	Putative receptor-like protein kinase	Zm00001d037341	Apyrase 1
Zm00001d051315	Uncharacterized protein	Zm00001d037342	Putative DUF26 domain family protein
Zm00001d015719	Uncharacterized protein	Zm00001d037343	ABA-induced protein
Zm00001d020779	Uncharacterized protein	Zm00001d004794	RING-type domain-containing protein
Zm00001d020780	Catalytic Activity	Zm00001d004796	Uncharacterized protein
Zm00001d020781	Probable purine permease	Zm00001d021892	Ethylene-responsive transcription factor RAP2-11
Zm00001d020782	Auxin responsive protein	Zm00001d021893	ARM repeat superfamily protein
Zm00001d020783	Coatomer subunit zeta	Zm00001d021894	Uncharacterized protein
Zm00001d020784	General transcription factor 2-related zinc finger protein	Zm00001d021895	Beta-hexosaminidase
Zm00001d032815	Glutamate-ammonia ligase	Zm00001d021896	L-type lectin-domain containing receptor kinase V.9
Zm00001d032817	Putative dual specificity protein phosphatase DSP8	Zm00001d021897	L-type lectin-domain containing receptor kinase V.9
Zm00001d032819	O-fucosyltransferase family protein	Zm00001d021898	DNA repair protein RAD51 homolog
Zm00001d032821	Uncharacterized protein	Zm00001d021899	Alpha/beta-Hydrolases superfamily protein
Zm00001d032822	Fibroin heavy chain	Zm00001d021900	Uncharacterized protein
Zm00001d032823	Glycine-rich cell wall structural protein 2	Zm00001d021901	Stress-induced protein1
Zm00001d032824	Protein-serine/threonine phosphatase	Zm00001d021902	Transducin/WD40 repeat-like superfamily protein
Zm00001d027265	Plasma membrane ATPase	Zm00001d021903	Glucan endo-1,3-beta-glucosidase 4
Zm00001d027266	DeSI-like protein	Zm00001d037279	Dynamin GTPase
Zm00001d027267	Alpha/beta-Hydrolases superfamily protein	Zm00001d037280	Uncharacterized protein
Zm00001d027268	Hexose carrier protein HEX6	Zm00001d037281	Uncharacterized protein
Zm00001d027269	Uncharacterized protein	Zm00001d037282	Aspartokinase 1 chloroplastic
Zm00001d025271	Transport protein particle component, Bet3 containing protein	Zm00001d037284	Pentatricopeptide repeat-containing protein
Zm00001d025273	Double Clp-N motif-containing P-loop nucleoside triphosphate hydrolase superfamily protein	Zm00001d037285	OSJNBa0089K21.9-like protein
Zm00001d025274	Protein TSSC4	Zm00001d037774	Auxin-responsive protein
Zm00001d025275	Putative homeodomain-like transcription factor superfamily protein	Zm00001d037775	Lactoylglutathione lyase
Zm00001d025277	Serine carboxypeptidase-like 51	Zm00001d037776	Uncharacterized protein
Zm00001d015717	Uncharacterized protein	Zm00001d037777	Alpha/beta-Hydrolases superfamily protein
Zm00001d015729	Peptidyl-prolyl cis-trans isomerase CYP95	Zm00001d035470	Putative MYB DNA-binding domain superfamily protein
Zm00001d015730	Uncharacterized protein	Zm00001d035471	Uncharacterized protein
Zm00001d037332	1-phosphatidylinositol-3-phosphate 5-kinase,	Zm00001d021396	Putative anion transporter 6 chloroplastic
Zm00001d037333	Ketose-bisphosphate aldolase class-II family protein	Zm00001d021398	Uncharacterized protein
Zm00001d037337	Ribonucleoside-diphosphate reductase small chain	Zm00001d021400	Octicosapeptide/Phox/Bem1p (PB1) domain-containing protein / tetratricopeptide repeat (TPR)-containing protein
Zm00001d037338	Endoglucanase	Zm00001d021401	Signal peptidase complex subunit 3
Zm00001d037339	Uncharacterized protein
